# Supplementary material for: Long and short photoperiod buds in hybrid aspen share structural development and expression patterns of marker genes
Source: PubMed Central journal article supplement (PMC4623686; doi:10.1093/jxb/erv380), 2015-08-05
Supplement: supp_erv380_Supplementary_Table_1.pdf [file supp_erv380_Supplementary_Table_1.pdf]

Supplementary Table S1

| Populus trichocarpa                      |                          |                  |                         |                          |                         |
|------------------------------------------|--------------------------|------------------|-------------------------|--------------------------|-------------------------|
| Protein                                  | Gene abb.                | Locus name v2.0  | Updated v3.0 locus name | Forward 5'-3'            | Reverse 5'-3'           |
| Flowering time genes                     |                          |                  |                         |                          |                         |
| FLOWERING LOCUS T                        | <i>FT1</i>               | POPTR_0008s07730 | Potri.008G077700        | GCGAGCTCAAGCCCTCTCA      | TGCATCAGGGTCCACCATAAC   |
| FLOWERING LOCUS T                        | <i>FT2</i>               | POPTR_0010s18680 | Potri.010G179700        | GAGTTGTGTGCTACGAGAGC     | CACTGTTGCCTGCCTAGTTG    |
| CENTRORADIALIS-LIKE1                     | <i>CENL1</i>             | POPTR_0004s21410 | Potri.004G203900        | AGTCCAACAGGAAGCAGGTTTTT  | AAAGGATCTCATACCTCCATGAA |
| CENTRORADIALIS-LIKE2                     | <i>CENL2</i>             | POPTR_0009s16670 | Potri.009G165100        | AGCTTTTCCCATCTGCTGTC     | CCTGGAACATCTGGGTCTGT    |
| CONSTANS                                 | <i>CO</i>                | POPTR_0004s10800 | Potri.004G108300        | GATGTTGGAGTGGTGCCAGAA    | TGGATAGCAGTGCTGGAGAAAAG |
| BROTHER OF FT                            | <i>BFT</i>               | POPTR_0015s13370 | Potri.015G141300        | ACAGACCCTGATGCTCCAAG     | CAGTTGTGCCAGGAATGTCA    |
| Genes affecting axillary shoot branching |                          |                  |                         |                          |                         |
| MORE AXILLARY BRANCHES1                  | <i>MAX1.1</i>            | POPTR_0006s24320 | Potri.006G226700        | AAACGTTATGGCCCCATTTT     | TGAGATGGGAGAGGGAACAC    |
| MORE AXILLARY BRANCHES1                  | <i>MAX1.2</i>            | POPTR_0018s07540 | Potri.018G062100        | CAGATGCCAACAGCTCAAGA     | TCCAGGTGCTAACCAGATCC    |
| BRANCHED1                                | <i>BRC1-LIKE</i>         | POPTR_0012s05660 | Potri.012G059900        | CATCATCGCGTAAAACCTCA     | GTCGATTCTTCGACTGCACA    |
| BRANCHED2                                | <i>BRC2-LIKE</i>         | POPTR_0010s14030 | Potri.010G130200        | ACTTGCTGCCACATCAATG      | AGTAGCCCCACTTGGAACTT    |
| PINFORMED                                | <i>PIN-LIKE1</i>         | POPTR_0012s04470 | Potri.012G047200        | TGTTAGGCTCGCTGATCTCC     | TGCAGACCAACTTTCTCAC     |
| PINFORMED                                | <i>PIN-LIKE2/PttPIN3</i> | POPTR_0006s03540 | Potri.006G037000        | CAATGACCTTGGTGGGGTAG     | GCTGTGGAGCTTGAAGCAA     |
| Meristem identity and organization       |                          |                  |                         |                          |                         |
| WUSCHEL                                  | <i>WUS-LIKE1</i>         | POPTR_0005s11680 | Potri.005G114700        | GGTGGTGAATCCATGAACAA     | AATCTTTTCAGCGGCTTCTCT   |
| WUSCHEL                                  | <i>WUS-LIKE2</i>         | POPTR_0007s14130 | Potri.007G012100        | ATTTCCAATGCTTGGTGAGG     | ACGGGAAGAAGTGTCAATTGC   |
| CLAVATA1                                 | <i>CLV1-LIKE</i>         | POPTR_0005s26300 | Potri.005G241500        | TCTCGCTAAGTTCTTACAAGATGC | ACACAAAACCTGTAACATCACTC |
| CLAVATA3                                 | <i>CLV3-LIKE</i>         | POPTR_0001s05380 | Potri.001G016100        | TGCAATGCATGAACAACAG      | CTCCCTTCCCATTCTTGTG     |
| KNOTTED1                                 | <i>KN1-LIKE</i>          | POPTR_0002s11400 | Potri.002G113300        | GCCAGGCAGAAGCTACTCAG     | CCAATGTCGCTTCTTTGAT     |
| SHOOT MERISTEMLESS                       | <i>STM-LIKE1</i>         | POPTR_0004s00650 | Potri.004G004700        | ACATGTTAATGCGGGGGATT     | TGTTGTTGTGGTTGTGATCG    |
| SHOOT MERISTEMLESS                       | <i>STM-LIKE2</i>         | POPTR_0011s01600 | Potri.011G011100        | GTCTCCTTGCTGCCTATGCT     | GCAATAGAAGCAGCCGATG     |
| Reference gene actin                     |                          |                  |                         |                          |                         |
| ACTIN                                    | <i>ACT</i>               | POPTR_0001s31700 | Potri.001G309500        | CGATGCCGAGGATATTCAAC     | ACCAGTGTGCTTGGTCTACCC   |
